# Supplementary material
Source: ML conference proceedings conference paper supplement (https://openaccess.thecvf.com/content/CVPR_2019/html/Meirovitch_Cross-Classification_Clustering_An_CVPR_2019_paper.html)
Supplement: Supplementary file 3 [file Meirovitch_Cross-Classification_Clustering_An_CVPR_2019_supplemental.zip]

Archive with 13 entries (10 files):
- 3468-supp/
- 3468-supp/3C-SNEMI3D.mp4
- __MACOSX/
- __MACOSX/3468-supp/
- __MACOSX/3468-supp/._3C-SNEMI3D.mp4
- 3468-supp/.DS_Store
- __MACOSX/3468-supp/._.DS_Store
- 3468-supp/3468-supp.pdf
- __MACOSX/3468-supp/._3468-supp.pdf
- 3468-supp/3C-PNS.mp4
- __MACOSX/3468-supp/._3C-PNS.mp4
- 3468-supp/3C-S1.mp4
- __MACOSX/3468-supp/._3C-S1.mp4
